# Supplementary material for: Insulin Internalizes GLUT2 in the Enterocytes of Healthy but Not Insulin-Resistant Mice
Source: Oxford University Press journal article supplement (doi:10.2337/db07-0928), 2007-12-05
Supplement: db070928onlineappendixtable.doc [file db070928onlineappendixtable.doc]

**TABLE I ON-LINE APPENDIX. Blood glucose and plasma insulin concentrations after OGTT in mice fed a fructose-rich and high fat diet**

Blood glucose (mg.dl-1) and plasma insulin (ng/ml) levels were measured after 18h fast. Mice were fed an isocaloric low-carbohydrate/protein-rich or fructose-rich diet for up to 30*d*. OGTT (4 mg glucose.g-1 BW) were performed and the area under the curve for glucose (∆G, mg.dl-1. min-1) and insulin (∆I, ng.ml-1.min-1) were calculated. ** P<0.05; *** *P<*0.001.

| Diet | days | T0 Insulin | T0 Glucose | n | ∆G | ∆I | ∆G/∆I | n |
| --- | --- | --- | --- | --- | --- | --- | --- | --- |
| 65% Protein | 5 | 0.24 ±0.04 | 92 ±4 | 20 | 480 ±50 | 0.8 ±0.1 | 720 ±140 | 11 |
| 65% Fructose | 5 | 0.35 ±0.06 | 90 ±2 | 10 | 840 ±80 | 0.9 ±0.1 | 1070 ±170 | 7 |
| 65% Fructose | 15 | 0.55 ±0.06*** | 94 ±3 | 23 | 980 ±90 | 0.8±0.1 | 1340 ±150** | 6 |
| 65% Fructose | 30 | 0.19 ±0.04 | 100 ±4 | 12 | 850 ±50 | 0.7 ±0.1 | 1520 ±220** | 12 |
| 72% Fat | 120 | 0.47 ± 0.05 | 119 ±5 | 8 | 993 ±66 | 0.5 ± 0.1 | 2185 ± 366** | 6 |
